# Supplementary material for: Body Fat Is Superior to Body Mass Index in Predicting Cardiometabolic Risk Factors in Adolescents
Source: MDPI journal article supplement (doi:10.3390/ijerph20032074), 2023-01-23
Supplement: s1 [file s1]

**Table S1.** Association of cardiometabolic risk factors with the BMI and %GC. Viçosa-MG, Brazil, 2010 to 2015 ( $n = 1043$ ).

| Risk Factors   | BMI *                 |            | %GC **                |            |
|----------------|-----------------------|------------|-----------------------|------------|
|                | Odds Ratio<br>(IC95%) | Value of p | Odds Ratio<br>(IC95%) | Value of p |
| <b>SBP</b>     | 1.06 (1.04–1.08)      | <0.001     | -                     | -          |
| <b>HDL</b>     | 0.97 (0.95–0.98)      | <0.001     | -                     | -          |
| <b>HOMA-IR</b> | 2.19 (1.82–2.64)      | <0.001     | 1.85 (1.55–2.22)      | <0.001     |
| <b>DBP</b>     | -                     | -          | 1.06 (1.04–1.08)      | <0.001     |

\*BMI <1 considered as a reference. \*\* %GC < 25% for girls and < 20% for boys considered as reference.

Legend: BMI: Body Mass Index; HDL: High Density Lipoprotein; HOMA-IR: Homeostasis Model Assessment – Insulin Resistance; SBP: Systolic Blood Pressure; DBP: Diastolic Blood Pressure.
